# Supplementary material
Source: HighWire-hosted journal article supplement (https://bjgp.org/highwire/filestream/46143/field_highwire_adjunct_files/0/BriefingReferences.pdf)
Supplement: BriefingReferences.pdf [file BriefingReferences.pdf]

## References

1. Madsen JK, Mikkelsen KS, Moynihan DP. Burdens, sludge, ordeals, red tape, oh my!: A user's guide to the study of frictions. *Public Administration* 2022; 100(2): 375–393.
2. Freedman S. Ordeals and the empathy gap. 2023.  
<https://samf.substack.com/p/ordeals-and-the-empathy-gap> (accessed 12 Apr 2023).
3. Sunstein CR. Sludge and ordeals. *Duke Law Journal* 2018; DOI: 10.2139/ssrn.3288192.
4. Lawson E. Complex systems harm people with complex needs. *Br J Gen Pract* 2022; DOI: <https://doi.org/10.3399/bjgp22X719789>.
5. Matthews KSH, Rennoldson SC, Fraser SDS. Influence of health-system change on treatment burden: a systematic review. *Br J Gen Pract* 2023; DOI: <https://doi.org/10.3399/BJGP.2022.0066>.
